# Supplementary material
Source: PubMed Central journal article supplement (PMC2992257)
Supplement: supp_M110.158626_jbc.M110.158626-1.pdf [file supp_M110.158626_jbc.M110.158626-1.pdf]

## **Supplemental Information**

### **SUBSTRATE SPECIFICITY OF HUMAN CARBOXYPEPTIDASE A6**

**Peter J. Lyons and Lloyd D. Fricker**

Department of Molecular Pharmacology  
Albert Einstein College of Medicine, Bronx, NY 10461

Contents:

Figure S1. Expression and purification of CPA6.

Figure S2. Binding to potato carboxypeptidase inhibitor (PCI) indicates correct folding of purified CPA6.

Figure S3. Effect of zinc on CPA6 catalytic activity.

Figure S4. Purified CPA6 exhibits similar catalytic activity as ECM-bound CPA6.

Table S1. Non-substrates of CPA6.

Table S2. Kinetic constants for four CPA enzymes.

Table S3. Amino acid numbering of substrate binding residues found in preprocarboxypeptidases compared to that of active bovine CPA1.

**Figure S1. Expression and purification of CPA6.** (A) Conditioned media (IN) and Talon metal-affinity chromatography flow-through (FT) and eluate (E1-3) fractions were resolved by SDS-PAGE. Total protein was stained with Coomassie blue and C-terminally HA and His6 tagged CPA6 detected by western blotting using an anti-HA antibody. Approximate protein size is shown in kDa on left. (B) Metal affinity column eluates were pooled and further purified using heparin affinity chromatography. Carboxypeptidase activity was measured by incubating 10 ul of each fraction with 1 ml 0.5 mM FA-Phe-Phe for 30 minutes at 37°C. IN, input; FT, flow-through; W, wash; E1-3, elution in 50 mM Tris and 600 mM NaCl, E4-8, elution in 50 mM Tris and 800 mM NaCl; E9, elution in 50 mM Tris and 1 M NaCl. Asterisks in (A) and arrow in (B) indicate Coomassie stained bands corresponding to CPA6 protein.

**Figure S1**

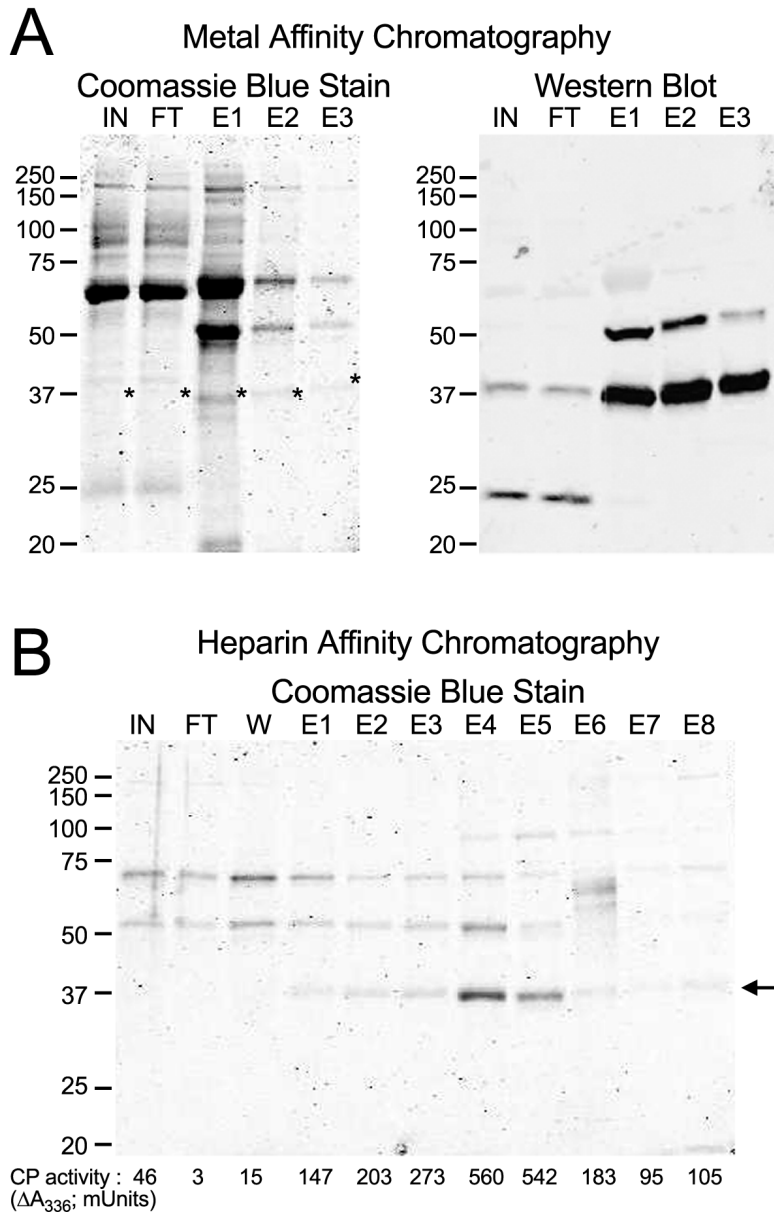

**Figure S2. Binding to potato carboxypeptidase inhibitor (PCI) indicates correct folding of purified CPA6.** Purified CPA6 (0.5 ml in 50 mM Tris pH 7.5, 500 mM NaCl) was passed through an equilibrated 0.5 mL column of PCI-Sepharose (IN, input; FT, flow-through). The column was washed with 3 ml of wash buffer (50 mM Tris pH 7.5, 500 mM NaCl) and 1 ml fractions collected (W1-3). The column was then eluted with 2.5 ml of 50 mM sodium phosphate pH 12.0, 500 mM NaCl, and 0.5 ml fractions collected (E1-5). Finally, the column was stripped with 1 ml of 1% SDS (E6). 15  $\mu$ l of each fraction was resolved by SDS-PAGE and HA-tagged CPA6 detected by western blotting. 10  $\mu$ l of each fraction was also incubated with 1 ml 0.4 mM FA-Phe-Phe in 50 mM Tris-HCl, pH 7.8, and 150 mM NaCl for 2 hrs at 22°C to determine relative activities. Enzymatic activity is shown below each lane of the western blot. nd, not detectable or < 10 mUnits, which is the limit of accurate detection.

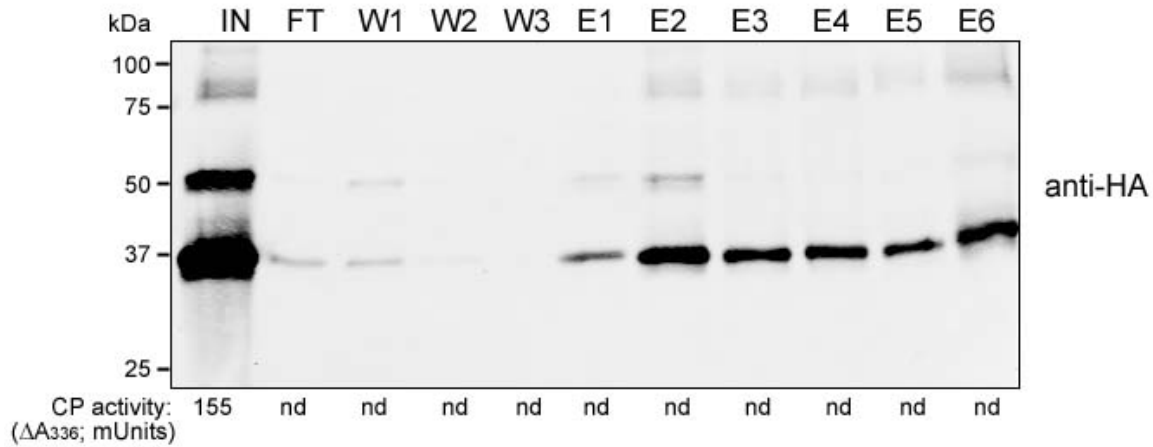

**Figure S3. Effect of zinc on CPA6 catalytic activity.** CPA6 cleavage of 0.4 mM FA-Phe-Phe at pH 7.8 was performed in the presence of 10 nM to 1 mM ZnSO<sub>4</sub> for the indicated times at 22°C. Low concentrations of ZnSO<sub>4</sub> (10 nM to 1  $\mu$ M) had no effect on CPA6 activity, while 10  $\mu$ M to 1 mM ZnSO<sub>4</sub> caused an inhibition of CPA6 activity.

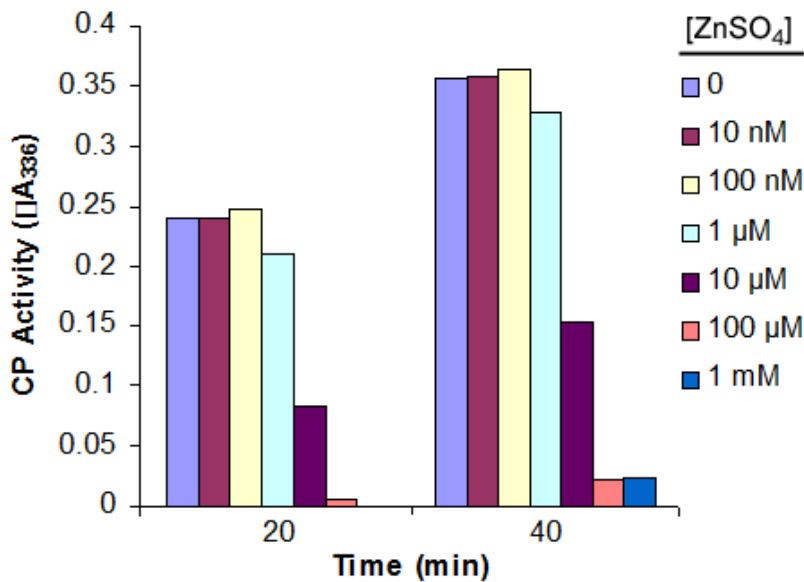

**Figure S4. Purified CPA6 exhibits similar catalytic activity as ECM-bound CPA6.** HEK293T cells were grown in 6-well plates and transiently transfected with a plasmid encoding CPA6-HAH6. After incubation for 48 hours, cells were removed, wells thoroughly washed, and ECM-bound CPA6 incubated with 0.4 mM FA-FF in 50 mM Tris, pH 7.8, 150 mM NaCl for two hours at 22°C while slowly shaking. Purified CPA6 (two-fold increments from 5.5 to 180 ng) was also incubated in tubes in the same manner. CP activity was measured by the change in substrate absorbance at 336 nm. Following these incubations, hot SDS-PAGE sample buffer was added to the wells to extract ECM, and to equivalent amounts of purified CPA6. These samples were resolved by SDS-PAGE and CPA6 identified by western blotting using an antibody raised against the HA epitope. As only 20% of total ECM was loaded on the gel, but all ECM incubated with substrate, enzyme activity values for ECM-bound CPA6 are shown adjusted for the amount of protein shown on gel. These results suggest that ECM-bound CPA6 exhibits generally similar activity as the purified enzyme, and that the low activity observed for purified CPA6 (relative to CPA1, 2, and 4; see Table S2) is likely to be physiologically relevant. Abbreviations: nd, not detectable or < 10 mUnits, which is the limit of accurate detection.

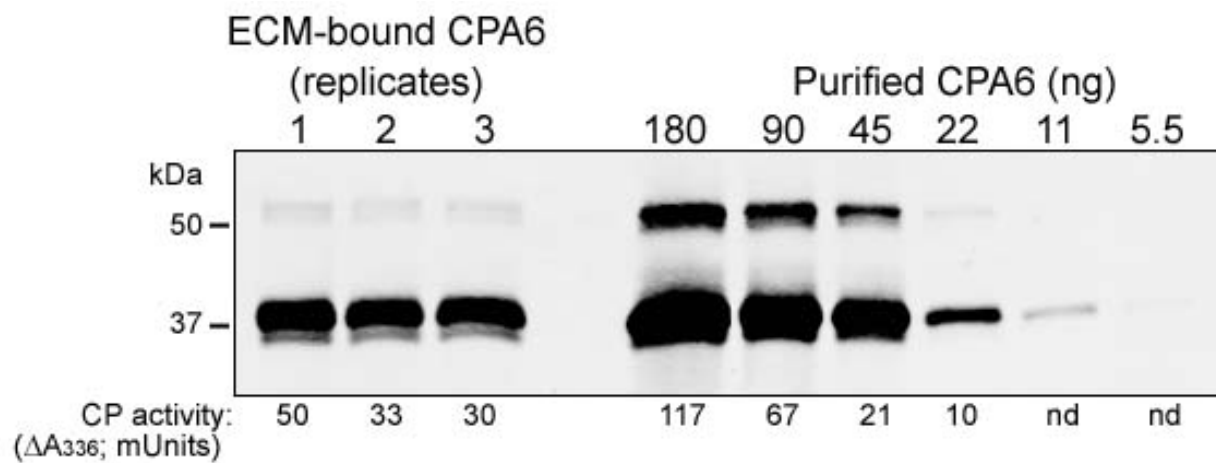

**Table S1. Non-substrates of CPA6**

| Protein name                     | Peptide name                                       | Sequence             | z   | T | Obs M   | Theor M  | ppm | Ratio, CPA4/no enzyme |          |           |
|----------------------------------|----------------------------------------------------|----------------------|-----|---|---------|----------|-----|-----------------------|----------|-----------|
|                                  |                                                    |                      |     |   |         |          |     | Low CPA6              | Med CPA6 | High CPA6 |
| Cerebellin 4                     | 63-77                                              | AANSKVAFSAVRSTN      | 3   | 2 | 1521.79 | 1521.790 | 0   | 1.13                  | 0.79     | 0.99      |
| Cerebellin 4                     | 64-77                                              | ANSKVAFSAVRSTN       | 3   | 2 | 1450.74 | 1450.753 | -7  | 1.04                  | 1.11     | 1.29      |
| Cerebellin 4                     | 66-77                                              | SKVAFSAVRSTN         | 3   | 2 | 1265.66 | 1265.673 | -12 | 1.17                  | 1.20     | 1.14      |
| Chromogranin B                   | 592-597                                            | (APQLDL)             | 1   | 1 | 655.35  | 655.35   | -7  | 0.93                  | 0.96     | 0.96      |
| Chromogranin B                   | phosphorylated 357-374                             | GLQYRGRGpSEEDRAPRP   | 5   | 1 | 2179.14 | 2179.073 | 29  | 1.12                  | 0.69     | 0.85      |
| Chromogranin B                   | 357-374                                            | GLQYRGRGSEEDRAPRP    | 5.6 | 1 | 2099.15 | 2099.073 | 39  | 0.92                  | 0.77     | 1.29      |
| Chromogranin B                   | 313-330                                            | PSPKESKEADVATVRLGE   | 4   | 3 | 1912.05 | 1911.990 | 31  | 1.17                  | 0.91     | 0.96      |
| Chromogranin B                   | 588-597                                            | SFARAPQLDL           | 2   | 1 | 1116.58 | 1116.590 | -6  | 1.13                  | 1.00     | 1.09      |
| Elongation factor 1 beta 2       | N-terminal fragment                                | GFGLKTPAGLQV         | 2   | 2 | 1301.70 | 1301.698 | 2   | 0.84                  | 0.93     | 1.36      |
| Fibrinogen alpha                 | N-terminal fragment (after signal peptide removal) | TDTEDKGEFLSEGGVVR    | 3   | 2 | 1795.83 | 1795.822 | 3   | 1.19                  | 0.83     | 0.98      |
| Phospholipase D3                 | 396-406                                            | FVPTDESQAR           | 2   | 2 | 1247.57 | 1247.615 | -38 | 1.15                  | 0.74     | 0.83      |
| Proenkephalin                    | 197-208                                            | SPQLEDEAKELQ         | 2   | 2 | 1385.65 | 1385.667 | -10 | 0.94                  | 0.86     | 1.32      |
| Prohormone convertase 1          | 619-628                                            | GVEKIMNVVE           | 2   | 2 | 1102.54 | 1102.569 | -25 | 1.04                  | 1.02     | 1.12      |
| Prohormone convertase 2          | 94-104 (within pro region)                         | IKMALQQEGFD          | 2   | 2 | 1278.60 | 1278.636 | -31 | 1.32                  | 1.00     | 1.07      |
| Prohormone convertase 2          | C-terminal fragment                                | SLQSILRKN            | 3   | 2 | 1057.62 | 1057.624 | -2  | 1.23                  | 1.14     | 0.86      |
| Promelanin concentrating hormone | Neuropeptide EI                                    | EIGDEENSAKFP I-amide | 2   | 2 | 1446.69 | 1446.683 | 4   | 1.18                  | 0.97     | 1.17      |
| ProSAAS                          | Big LEN                                            | LENPSPQAPARRLLPP     | 3   | 1 | 1754.98 | 1754.979 | 1   | 0.96                  | 1.00     | 0.96      |
| ProSAAS                          | Little SAAS 1-16                                   | SLSAASAPLVETSTPL     | 2   | 1 | 1542.79 | 1542.814 | -13 | 1.03                  | 0.81     | 1.21      |
| Prosomatostatin                  | Somatostatin 28-14                                 | SANSNPAMAPRE         | 2   | 1 | 1243.56 | 1243.562 | 0   | 1.30                  | 1.17     | 1.09      |

|                                                    |                                                |  |                                                     |     |   |         |          |     |      |      |      |
|----------------------------------------------------|------------------------------------------------|--|-----------------------------------------------------|-----|---|---------|----------|-----|------|------|------|
| ProVasoactive Intestinal Peptide                   | 111-122                                        |  | ISSISEDVPI                                          | 2   | 1 | 1242.61 | 1242.634 | -17 | 1.05 | 0.80 | 0.88 |
| Thioredoxin 1                                      | 16-27                                          |  | AAAGDKLVVDF                                         | 2   | 2 | 1203.64 | 1203.650 | -8  | 1.42 | 0.83 | 0.83 |
| Thioredoxin 1                                      | N-terminal fragment                            |  | VKLIESKEAFQEALAA                                    | 3   | 3 | 1745.90 | 1745.956 | -33 | 1.27 | 1.12 | 0.88 |
| Thymosin beta-10                                   | Entire protein after removal of N-terminal Met |  | Ac-ADKPDMEIASFDKAKLKKTTETQ<br>EKNTLPTKETIEQEKRSEIS  | 7-9 | 8 | 4933.63 | 4933.523 | 22  | 0.94 | 0.74 | 1.08 |
| Thymosin beta-10                                   | C-terminal fragment                            |  | TLPTKETIEQEKRSEIS                                   | 4   | 3 | 1987.98 | 1988.043 | -33 | 1.09 | 0.78 | 0.91 |
| Thymosin beta-4                                    | Entire protein after removal of N-terminal Met |  | Ac-SDKPDMAEIEKFDKSKLKKTTETQ<br>EKNPLPSKETIEQEKGAGES | 5-9 | 9 | 4960.49 | 4960.486 | 1   | 1.02 | 0.74 | 0.91 |
| Thymosin beta-4                                    | C-terminal fragment                            |  | PLPSKETIEQEKGAGES                                   | 3   | 3 | 1869.88 | 1869.932 | -28 | 0.78 | 0.77 | 0.70 |
| Tubulin beta                                       | N-terminal fragment, isoforms 2-6              |  | MREIVH(I/L)QAGQ                                     | 3   | 1 | 1280.71 | 1280.674 | 29  | 0.91 | 0.86 | 0.97 |
| Vacuolar proton pump subunit G 2                   | C-terminal fragment                            |  | EVRPQVHPNYRVTV                                      | 4   | 1 | 1692.97 | 1692.913 | 34  | 0.69 | 0.73 | 1.12 |
| VGf                                                | 489-507                                        |  | NAPPEPVPPPRAAPAPTHV                                 | 3   | 1 | 1914.01 | 1914.010 | 0   | 1.10 | 1.05 | 1.20 |
| Voltage-dependent anion channel protein 1 (VDAC-1) | C-terminal fragment                            |  | AGGHKLGLEFQA                                        | 3   | 2 | 1396.70 | 1396.746 | -32 | 0.93 | 0.98 | 0.97 |

All peptides were identified by MS/MS sequencing except one peptide (APQLDL) for which insufficient MS/MS information was available. This peptide was tentatively identified based on matches to known peptides and predicted cleavage sites and this is indicated by parentheses surrounding the sequence. Abbreviations: z, charge; T, number of TMAB tags; Obs M, observed monoisotopic mass (after subtraction of the mass of the TMAB tags); Theor M, theoretical monoisotopic mass of the uncharged peptide without TMAB tags; ppm, difference in parts per million between observed mass and theoretical mass; ratio indicates the peak intensity observed for peptide incubated with CPA6 divided by the peak intensity for the same peptide incubated without enzyme.

**Table S2. Kinetic constants for four CPA enzymes**

| Substrate  | CPA6            |                  |                                                                      | CPA4            |                  |                                                                      | CPA1            |                  |                                                                      | CPA2            |                  |                                                                      |
|------------|-----------------|------------------|----------------------------------------------------------------------|-----------------|------------------|----------------------------------------------------------------------|-----------------|------------------|----------------------------------------------------------------------|-----------------|------------------|----------------------------------------------------------------------|
|            | $k_{cat}$ (1/s) | $K_M$ ( $\mu$ M) | $k_{cat}/K_M$ ( $M^{-1}\cdot s^{-1}\cdot 10^{-5}$ ) relative to FAPP | $k_{cat}$ (1/s) | $K_M$ ( $\mu$ M) | $k_{cat}/K_M$ ( $M^{-1}\cdot s^{-1}\cdot 10^{-5}$ ) relative to FAPP | $k_{cat}$ (1/s) | $K_M$ ( $\mu$ M) | $k_{cat}/K_M$ ( $M^{-1}\cdot s^{-1}\cdot 10^{-5}$ ) relative to FAPP | $k_{cat}$ (1/s) | $K_M$ ( $\mu$ M) | $k_{cat}/K_M$ ( $M^{-1}\cdot s^{-1}\cdot 10^{-5}$ ) relative to FAPP |
| FA-Phe-Phe | 9.94            | 266              | 0.37                                                                 | 44.3            | 55.6             | 7.97                                                                 | 1.00            | 20.4             | 37.6                                                                 | 1.00            | 36.4             | 33.3                                                                 |
| FA-Phe-Trp | 4.13            | 339              | 0.15                                                                 | 57.3            | 615              | 0.93                                                                 | 0.12            | 166              | 4.90                                                                 | 0.13            | 16.3             | 40.2                                                                 |
| FA-Phe-Leu | 4.67            | 386              | 0.19                                                                 | 13.4            | 19.4             | 6.93                                                                 | 0.87            | 15.7             | 21.7                                                                 | 0.58            | 393              | 0.47                                                                 |
| FA-Phe-Ile | 1.91            | 3070             | 0.0065                                                               | 12.4            | 23.3             | 5.32                                                                 | 0.67            | 9.33             | 10.5                                                                 | 0.28            | 460              | 0.0035                                                               |
| FA-Phe-Met | 4.03            | 786              | 0.066                                                                | 23.9            | 40.0             | 5.81                                                                 | 0.73            | 128              | 4.03                                                                 | 0.11            | NM               | 0.0012                                                               |
| FA-Phe-Ala | 0.40            | 2330             | 0.0017                                                               | 24.3            | 372              | 0.65                                                                 | 0.082           | 300              | 2.58                                                                 | 0.069           | NM               | NM                                                                   |
| FA-Phe-Val | 0.16            | 367              | 0.0043                                                               | 19.4            | 57.3             | 3.38                                                                 | 0.42            | 8.95             | 14.8                                                                 | 0.39            | NM               | 0.030                                                                |
| FA-Phe-His | 0.28            | 723              | 0.0051                                                               | NM              | NM               | 0.27                                                                 | 0.034           | NM               | 1.04                                                                 | 0.028           | NM               | NM                                                                   |

NM: Not measurable; below the limit of detection.

CPA1, CPA2 and CPA4 data taken from Ref. (22)

**Table S3. Amino acid numbering of substrate binding residues found in preprocarboxypeptidases compared to that of active bovine CPA1.**

|                      | CPA/B Active Site Amino Acids |         |         |         |         |         |         |         |  |  |
|----------------------|-------------------------------|---------|---------|---------|---------|---------|---------|---------|--|--|
|                      | 203                           | 207     | 243     | 247     | 250     | 253     | 255     | 268     |  |  |
| Bovine CPA1 (active) |                               |         |         |         |         |         |         |         |  |  |
| Bovine CPA1          | Leu 313                       | Gly 317 | Ile 353 | Ile 357 | Ala 360 | Gly 363 | Ile 365 | Thr 378 |  |  |
| Human CPA2           | Met 311                       | Gly 315 | Ile 351 | Ile 355 | Ala 358 | Gly 361 | Ile 363 | Ala 376 |  |  |
| Mouse CPA3           | Leu 311                       | Gly 315 | Ile 351 | Ile 355 | Thr 358 | Ser 361 | Leu 363 | Ala 376 |  |  |
| Human CPA4           | Met 315                       | Gly 319 | Thr 355 | Val 359 | Ala 362 | Ser 365 | Ile 367 | Thr 380 |  |  |
| Human CPA5           | Met 330                       | Gly 334 | Ile 370 | Leu 374 | Ala 377 | Ile 380 | Val 382 | Ser 395 |  |  |
| Human CPA6           | Leu 331                       | Ser 335 | Ala 371 | Leu 375 | Ser 378 | Ser 381 | Met 383 | Ala 396 |  |  |
| Pig CPB1             | Leu 311                       | Ser 315 | Gly 351 | Ile 355 | Ala 358 | Gly 361 | Asp 363 | Thr 376 |  |  |
| Human CPB2           | Val 307                       | Ser 311 | Gly 348 | Leu 352 | Ala 355 | Gly 358 | Asp 360 | Thr 373 |  |  |
